# Supplementary material
Source: publisher figshare collection journal article supplement (https://sage.figshare.com/ndownloader/files/22809848)
Supplement: Supplementary file 1 [file 22809848]

**Supplement 1. Survey participant characteristics, weighted descriptive statistics from the 2017 Choose Water Internet Panel Survey<sup>A</sup>**

|                                                                             | Total Sample |      | Not exposed to the visual[s] <sup>A</sup> | Exposed, but did not discuss the visual[s] <sup>A</sup> | Exposed, and discussed the visual[s] <sup>A</sup> | p-value |
|-----------------------------------------------------------------------------|--------------|------|-------------------------------------------|---------------------------------------------------------|---------------------------------------------------|---------|
|                                                                             | n = 499      |      | n = 282                                   | n = 86                                                  | n = 131                                           |         |
|                                                                             | n            | %    | %                                         | %                                                       | %                                                 |         |
| <b>Outcomes</b>                                                             |              |      |                                           |                                                         |                                                   |         |
| Agreement with statement, "Intention to give child more water" <sup>C</sup> |              |      |                                           |                                                         |                                                   | 0.005   |
| Disagree/Neither Agree nor Disagree/Agree Somewhat                          | 195          | 42.4 | 47.6                                      | 42.2                                                    | 24.0                                              |         |
| Agree strongly                                                              | 304          | 57.6 | 52.5                                      | 57.8                                                    | 76.0                                              |         |
| Agreement with statement, "Intention to give child fewer SSBs" <sup>B</sup> |              |      |                                           |                                                         |                                                   | 0.002   |
| Disagree/Neither Agree nor Disagree/Agree Somewhat                          | 205          | 41.1 | 45.2                                      | 46.6                                                    | 21.0                                              |         |
| Agree strongly                                                              | 294          | 58.9 | 54.8                                      | 53.4                                                    | 79.0                                              |         |
| <b>Covariates</b>                                                           |              |      |                                           |                                                         |                                                   |         |
| Gender                                                                      |              |      |                                           |                                                         |                                                   | 0.016   |
| Female                                                                      | 288          | 71.1 | 75.9                                      | 66.1                                                    | 58.5                                              |         |
| Male                                                                        | 211          | 29.0 | 24.1                                      | 33.9                                                    | 41.5                                              |         |
| Age                                                                         |              |      |                                           |                                                         |                                                   | 0.277   |
| 18-29                                                                       | 162          | 38.7 | 37.7                                      | 48.3                                                    | 33.2                                              |         |
| 30-39                                                                       | 261          | 44.6 | 45.8                                      | 32.4                                                    | 52.2                                              |         |
| 40-65                                                                       | 76           | 16.7 | 16.5                                      | 19.3                                                    | 14.6                                              |         |
| Race/ethnicity                                                              |              |      |                                           |                                                         |                                                   | 0.000   |
| White, Non-Hispanic                                                         | 236          | 16.4 | 12.9                                      | 13.3                                                    | 32.0                                              |         |
| Hispanic/Latino                                                             | 158          | 61.8 | 65.0                                      | 64.5                                                    | 47.6                                              |         |
| African American/Black                                                      | 40           | 10.4 | 12.1                                      | 9.1                                                     | 6.0                                               |         |
| Asian                                                                       | 45           | 8.4  | 7.3                                       | 6.4                                                     | 14.5                                              |         |
| Other                                                                       | 20           | 3.0  | 2.8                                       | 6.7                                                     | 0.0                                               |         |
| Education <sup>P</sup>                                                      |              |      |                                           |                                                         |                                                   | 0.004   |
| High School Graduate and Less                                               | 76           | 23.2 | 22.9                                      | 37.2                                                    | 10.5                                              |         |
| Some College                                                                | 135          | 36.3 | 38.6                                      | 32.4                                                    | 31.6                                              |         |
| College Graduate +                                                          | 288          | 40.6 | 38.5                                      | 30.4                                                    | 57.9                                              |         |
| Income                                                                      |              |      |                                           |                                                         |                                                   | 0.001   |
| < \$25,000                                                                  | 56           | 15.3 | 11.7                                      | 24.5                                                    | 19.2                                              |         |
| \$25,000 - \$49,999                                                         | 121          | 34.5 | 40.1                                      | 31.0                                                    | 18.2                                              |         |
| \$50,000 - \$74,999                                                         | 184          | 33.4 | 35.7                                      | 27.5                                                    | 31.1                                              |         |

|                                                                                               |     |      |      |      |      |        |
|-----------------------------------------------------------------------------------------------|-----|------|------|------|------|--------|
| \$75,000 - \$100,000                                                                          | 138 | 16.8 | 12.6 | 17.0 | 31.6 |        |
| Number of children under age 18 in household                                                  |     |      |      |      |      | 0.166  |
| One                                                                                           | 185 | 42.4 | 44.9 | 45.0 | 31.0 |        |
| Two                                                                                           | 241 | 38.5 | 36.8 | 41.4 | 41.6 |        |
| Three                                                                                         | 45  | 9.9  | 7.6  | 9.2  | 18.4 |        |
| Four +                                                                                        | 28  | 9.3  | 10.7 | 4.6  | 8.9  |        |
| Agreement with statement "Drinking SSB at a young age<br>can cause child(ren) to gain weight" |     |      |      |      |      | 0.2124 |
| Agree                                                                                         | 397 | 77.5 | 76.0 | 74.7 | 85.8 |        |
| Neutral/Disagree                                                                              | 102 | 22.5 | 24.0 | 25.4 | 14.2 |        |

<sup>A</sup> Question asked "before taking this survey, had you seen this advertisement or any other images associated with this campaign?" If yes, "did you speak [discuss] with anyone about these ads or did someone bring them up in conversation?" <sup>B</sup> Questions asked how much the participant agree or disagree with "This ad makes me want to give fewer sugar-sweetened beverages to [my children/my grandchildren/the children]." <sup>C</sup> Question asked how much the participant agree or disagree with "This ad makes me want to take action and give [my children/my grandchildren/the children] more water to drink." <sup>D</sup> Two participants had missing information on educational attainment. Note: SSB = sugar-sweetened beverage, Ad = advertisement visual, OR = odds ratio; data are weighted to represent parents ages 18-74 with children under 18 years of age and have a household income less than or equal to \$70,000.
